# Supplementary material for: Sulfur-doped graphene/transition metal dichalcogenide heterostructured hybrids with electrocatalytic activity toward the hydrogen evolution reaction
Source: Royal Society of Chemistry journal article supplement (doi:10.1039/c8na00130h), 2019-01-01
Supplement: c8na00130h1.pdf [file c8na00130h1.pdf]

## **ELECTRONIC SUPPLEMENTARY INFORMATION**

### **Sulfur-doped Graphene / Transition Metal Dichalcogenide Heterostructured Hybrids with Electrocatalytic Activity Toward the Hydrogen Evolution Reaction**

Antonia Kagkoura,<sup>a</sup> Mario Pelaez-Fernandez,<sup>b</sup> Raul Arenal<sup>b,c</sup> and  
Nikos Tagmatarchis <sup>\*a</sup>

<sup>a</sup>Theoretical and Physical Chemistry Institute, National Hellenic Research  
Foundation, 48 Vassileos Constantinou Avenue, 11635 Athens, Greece

<sup>b</sup>Laboratorio di Microscopias Avanzadas, Instituto de Nanociencia de Aragon,  
Universidad de Zaragoza, 50018 Zaragoza, Spain

<sup>c</sup>ARAID Foundation, 50018 Zaragoza, Spain

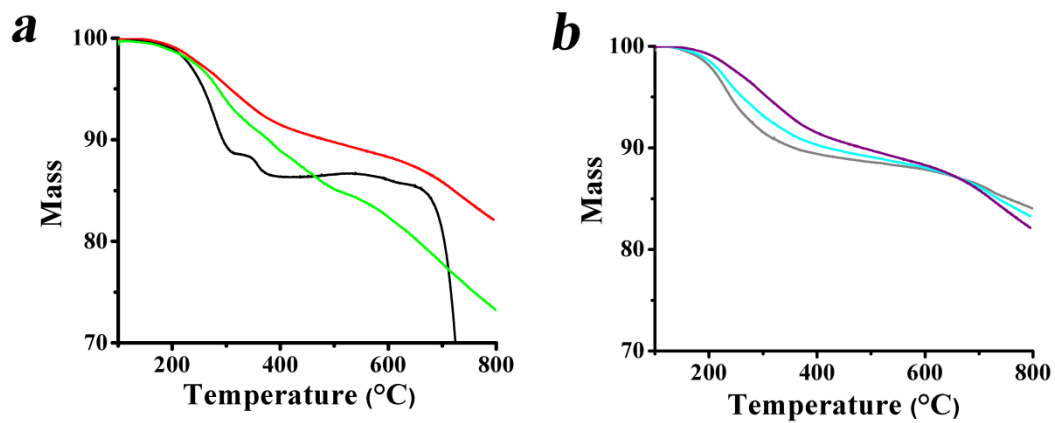

**Figure S1.** Thermogravimetric analysis graphs for (a) SG/MoS<sub>2</sub> (3:1) (red), SG/MoS<sub>2</sub> (1:1) (green), and MoS<sub>2</sub> (black), and (b) SG/WS<sub>2</sub> (3:1) (purple), SG/WS<sub>2</sub> (1:1) (cyan), and WS<sub>2</sub> (grey), obtained under nitrogen.

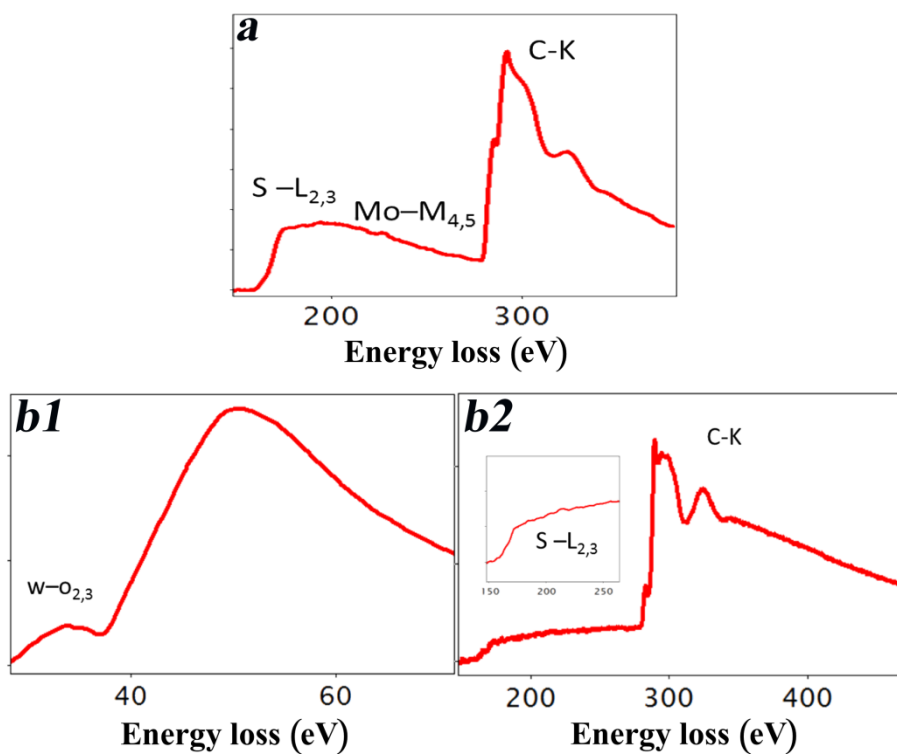

**Figure S2.** (a) EEL spectrum of material displayed in Figure 4c, showing the C-K, S-L<sub>2,3</sub> and Mo-M<sub>4,5</sub> edges. (b1, b2) EEL spectra of material displayed in Figure 4f, showing the C-K, S-L<sub>2,3</sub> and W-O<sub>2,3</sub> edges.

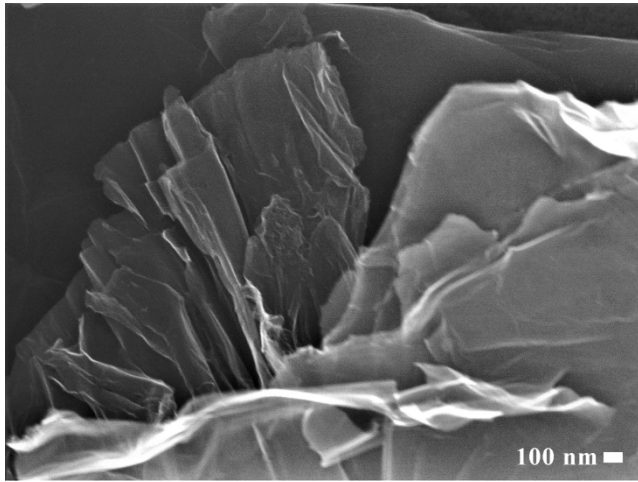

**Figure S3.** Representative SEM image of SG.

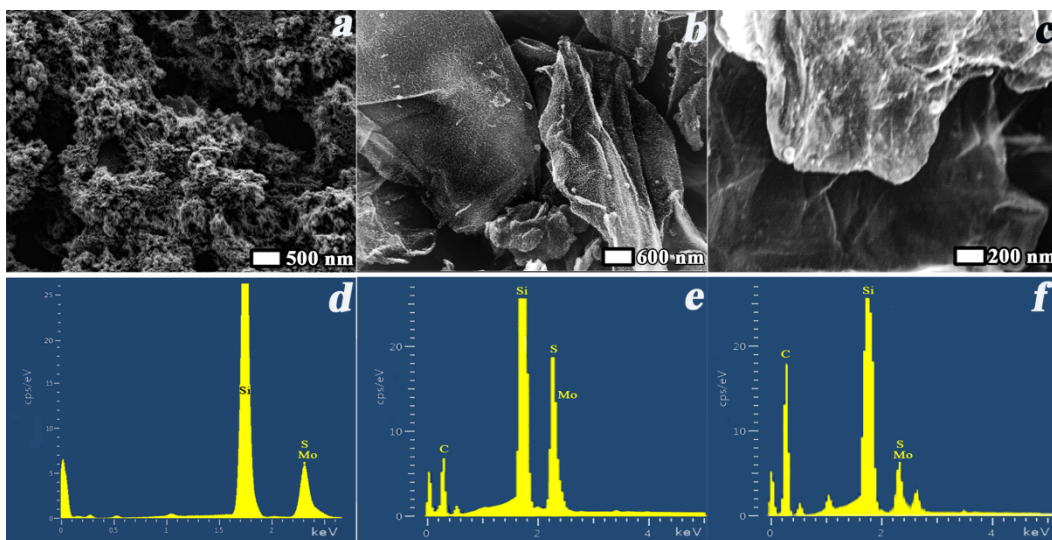

**Figure S4.** SEM images for (a) MoS<sub>2</sub>, (b) SG/MoS<sub>2</sub> (1:1), and (c) SG/MoS<sub>2</sub> (3:1). EDS for (d) MoS<sub>2</sub>, (e) SG/MoS<sub>2</sub> (1:1), and (f) SG/MoS<sub>2</sub> (3:1). The presence of Si is due to the sample holder.

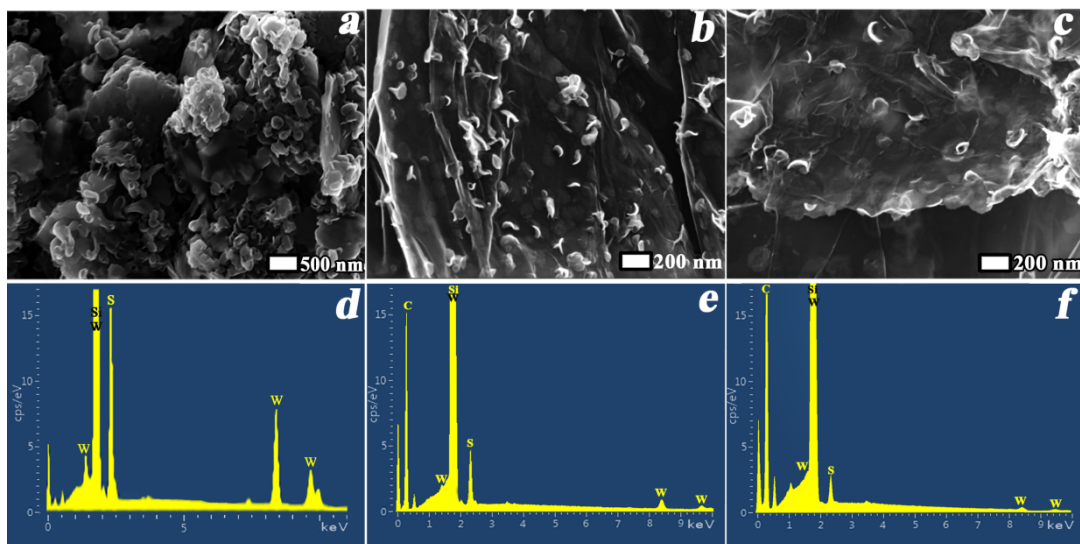

**Figure S5.** SEM images for (a) WS<sub>2</sub>, (b) SG/WS<sub>2</sub> (1:1), and (c) SG/WS<sub>2</sub> (3:1). EDS for (d) WS<sub>2</sub>, (e) SG/WS<sub>2</sub> (1:1), and (f) SG/WS<sub>2</sub> (3:1). The presence of Si is due to the sample holder.

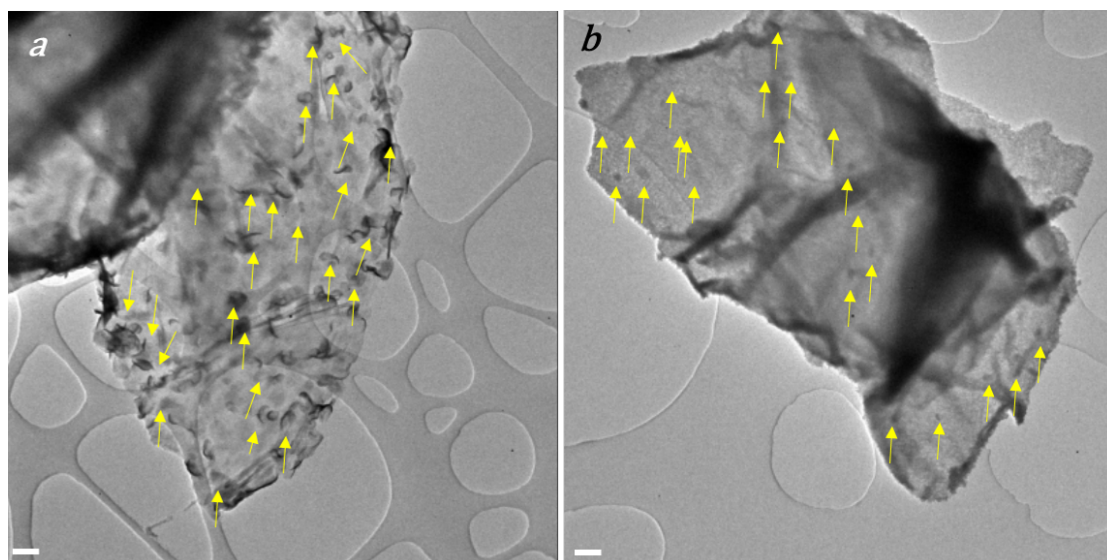

**Figure S6.** Low magnification TEM images of (a) SG/MoS<sub>2</sub> (1:1), and (b) SG/WS<sub>2</sub>, (1:1). Typical MoS<sub>2</sub> and WS<sub>2</sub> features are highlighted with yellow arrows. The scale bar is 200 nm.

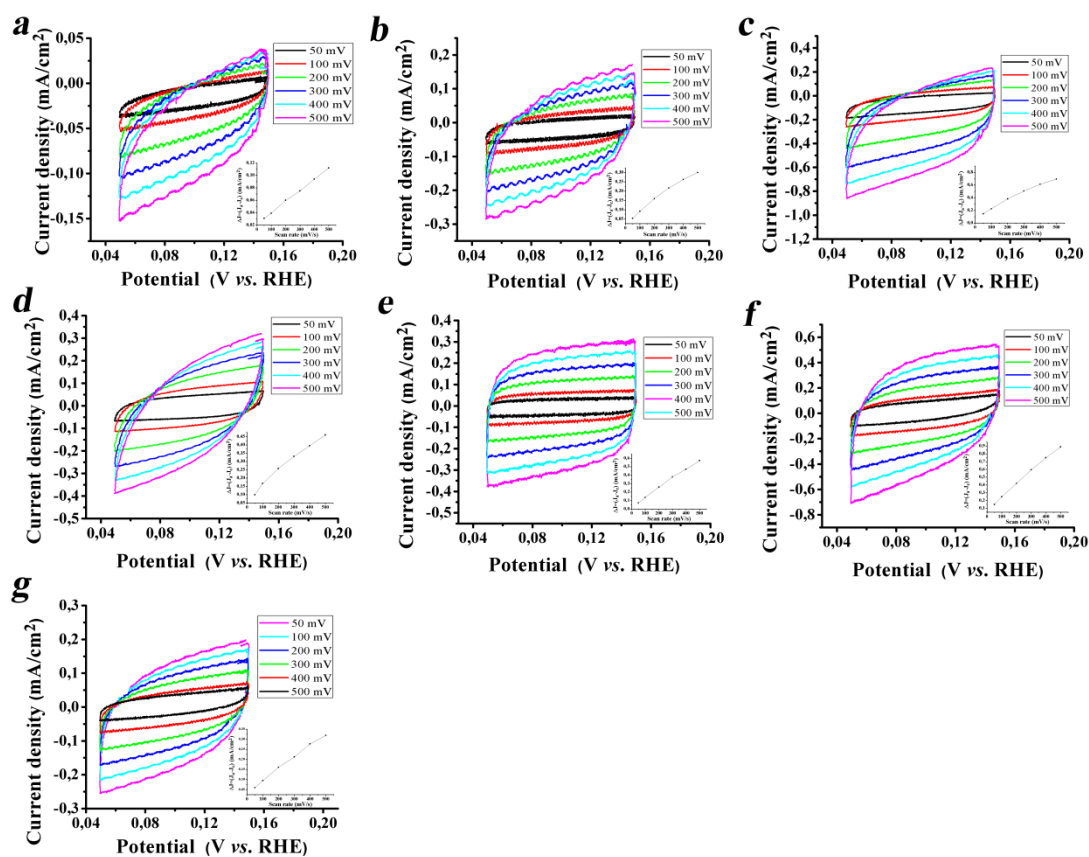

**Figure S7.** Cyclic voltammograms of (a) MoS<sub>2</sub>, (b) SG/MoS<sub>2</sub> (1:1), (c) SG/MoS<sub>2</sub> (3:1), (d) WS<sub>2</sub>, (e) SG/WS<sub>2</sub> (1:1), (f) SG/WS<sub>2</sub> (3:1) and (g) SG measured in a nitrogen saturated aqueous 0.5 M H<sub>2</sub>SO<sub>4</sub> electrolyte, at a rotation speed of 1,600 rpm and scan rates from 50 to 500 mV/s. Inset: images of the scan rate dependence of the current densities for the corresponding materials.



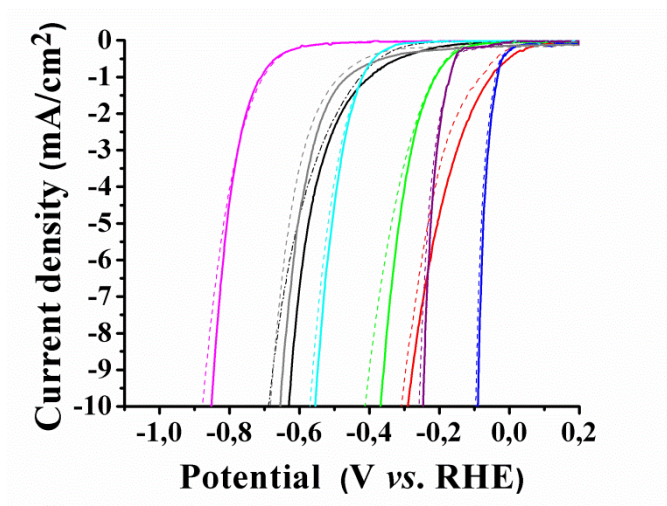

**Figure S8.** LSV for HER of (a) SG/MoS<sub>2</sub> (3:1) (red), SG/MoS<sub>2</sub> (1:1) (green), MoS<sub>2</sub> (black), SG/WS<sub>2</sub> (3:1) (purple), SG/WS<sub>2</sub> (1:1) (cyan), WS<sub>2</sub> (grey), SG (pink) and Pt/C (blue) (solid lines) before after 1,000 cycles (dashed lines). The LSV polarization curves were obtained in a nitrogen saturated aqueous 0.5 M H<sub>2</sub>SO<sub>4</sub> electrolyte, at a rotation speed of 1,600 rpm and scan rate of 5 mV/s.
